# Supplementary material
Source: PubMed Central journal article supplement (PMC5652859)
Supplement: DS_10.1177_0022034517720924.pdf [file DS_10.1177_0022034517720924.pdf]

## Do Genetic Markers of Inflammation Modify the Relationship between Periodontitis and Nonalcoholic Fatty Liver Disease? Findings from the SHIP Study

A.A. Akinkugbe, C.L. Avery, A.S. Barritt, S.R. Cole, M. Lerch, J. Mayerle, S. Offenbacher, A. Petersmann, M. Nauck, H. Völzke, G.D. Slade, G. Heiss, T. Kocher, and B. Holtfreter

**Appendix Table 1.** List of SNPs used in constructing the weighted genetic scores with their original source of publication and the corresponding information used in constructing the scores

| SNP                                             | Chr | Position  | Coded Allele | Beta  | SE    | P-value                | Closest Gene   | Study                                    |
|-------------------------------------------------|-----|-----------|--------------|-------|-------|------------------------|----------------|------------------------------------------|
| <b>C-reactive Protein</b>                       |     |           |              |       |       |                        |                |                                          |
| rs2794520                                       | 1   | 157945440 | C            | 0.160 | 0.006 | 2.0x10 <sup>-186</sup> | <i>CRP</i>     | Dehghan et al 2011;<br>Naitza et al 2012 |
| rs4420638                                       | 19  | 50114786  | A            | 0.236 | 0.009 | 8.8x10 <sup>-139</sup> | <i>APOC1</i>   | Dehghan et al 2011                       |
| rs1183910                                       | 12  | 119905190 | G            | 0.149 | 0.006 | 2.1x10 <sup>-124</sup> | <i>HNF1A</i>   | Dehghan et al 2011                       |
| rs4420065                                       | 1   | 65934049  | C            | 0.090 | 0.005 | 3.5x10 <sup>-62</sup>  | <i>LEPR</i>    | Dehghan et al 2011                       |
| rs4129267                                       | 1   | 152692888 | C            | 0.079 | 0.005 | 2.1x10 <sup>-48</sup>  | <i>IL6R</i>    | Dehghan et al 2011;                      |
| rs1260326                                       | 2   | 27584444  | T            | 0.072 | 0.005 | 4.6x10 <sup>-40</sup>  | <i>GCKR</i>    | Dehghan et al 2011                       |
| rs12239046                                      | 1   | 245668218 | C            | 0.047 | 0.006 | 1.2x10 <sup>-15</sup>  | <i>NLRP3</i>   | Dehghan et al 2011                       |
| rs6734238                                       | 2   | 113557501 | G            | 0.050 | 0.006 | 1.8x10 <sup>-17</sup>  | <i>IL1F10</i>  | Dehghan et al 2011                       |
| rs9987289                                       | 8   | 9220768   | G            | 0.069 | 0.011 | 3.4x10 <sup>-13</sup>  | <i>PPP1R3B</i> | Dehghan et al 2011                       |
| rs10745954                                      | 12  | 102007224 | A            | 0.039 | 0.006 | 1.6x10 <sup>-11</sup>  | <i>ASCL1</i>   | Dehghan et al 2011                       |
| rs1800961                                       | 20  | 42475778  | C            | 0.088 | 0.015 | 2.2x10 <sup>-9</sup>   | <i>HNF4A</i>   | Dehghan et al 2011                       |
| rs340029                                        | 15  | 58682257  | T            | 0.032 | 0.006 | 4.1x10 <sup>-9</sup>   | <i>RORA</i>    | Dehghan et al 2011                       |
| rs10521222                                      | 16  | 49716211  | C            | 0.104 | 0.015 | 8.5x10 <sup>-13</sup>  | <i>SALL1</i>   | Dehghan et al 2011                       |
| rs12037222                                      | 1   | 39837548  | A            | 0.045 | 0.007 | 6.4x10 <sup>-11</sup>  | <i>PABPC4</i>  | Dehghan et al 2011                       |
| rs13233571                                      | 7   | 72609167  | A            | 0.054 | 0.009 | 3.6x10 <sup>-9</sup>   | <i>BCL7B</i>   | Dehghan et al 2011                       |
| rs2847281                                       | 18  | 12811593  | A            | 0.031 | 0.006 | 2.2x10 <sup>-8</sup>   | <i>PTPN2</i>   | Dehghan et al 2011                       |
| rs6901250                                       | 6   | 117220718 | A            | 0.035 | 0.006 | 4.8x10 <sup>-8</sup>   | <i>GPRC6A</i>  | Dehghan et al 2011                       |
| rs4705952                                       | 5   | 131867517 | G            | 0.042 | 0.007 | 1.3x10 <sup>-8</sup>   | <i>IRF1</i>    | Dehghan et al 2011                       |
| rs12068753                                      |     | 157959161 | A            | 0.213 | 0.035 | 1.2x10 <sup>-9</sup>   | <i>DARC</i>    | Naitza et al 2012                        |
| <b>Interleukin-6 (IL-6)</b>                     |     |           |              |       |       |                        |                |                                          |
| rs643434                                        | 9   | 135132176 | G            | 0.245 | 0.026 | 2.7x10 <sup>-21</sup>  | <i>ABO</i>     | Naitza et al 2012                        |
| <b>Erythrocyte Sedimentation Rate (ESR)</b>     |     |           |              |       |       |                        |                |                                          |
| rs12034598                                      | 1   | 205824138 | G            | 0.143 | 0.022 | 9.3x10 <sup>-11</sup>  | <i>CR1</i>     | Naitza et al 2012                        |
| rs4910742                                       | 11  | 5263085   | A            | 0.229 | 0.042 | 6.3x10 <sup>-8</sup>   |                | Naitza et al 2012                        |
| <b>Monocyte Chemoattractant Protein (MCP-1)</b> |     |           |              |       |       |                        |                |                                          |

|           |   |           |   |       |       |                       |              |                   |
|-----------|---|-----------|---|-------|-------|-----------------------|--------------|-------------------|
| rs12075   | 1 | 157441978 | A | 0.303 | 0.026 | $1.7 \times 10^{-30}$ | <i>DARC</i>  | Naitza et al 2012 |
| rs3026968 | 1 | 157414076 | T | 0.239 | 0.033 | $7.6 \times 10^{-13}$ | <i>CADM3</i> | Naitza et al 2012 |

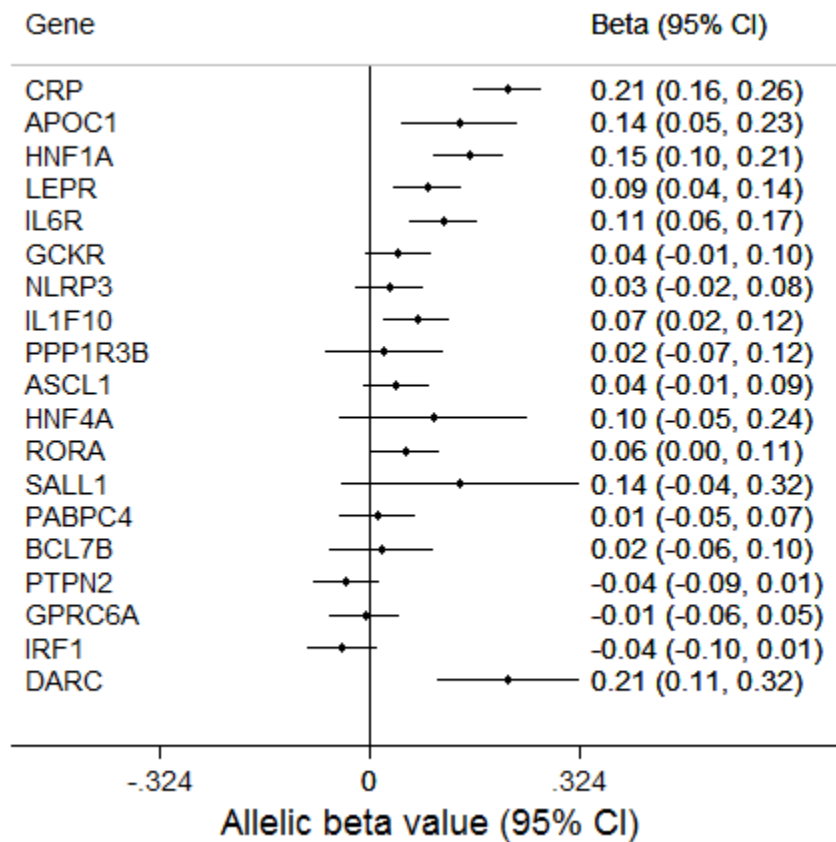

**Appendix Figure 1.** Associations between known CRP SNPs and log transformed serum CRP levels measured in the Study of Health in Pomerania (SHIP)

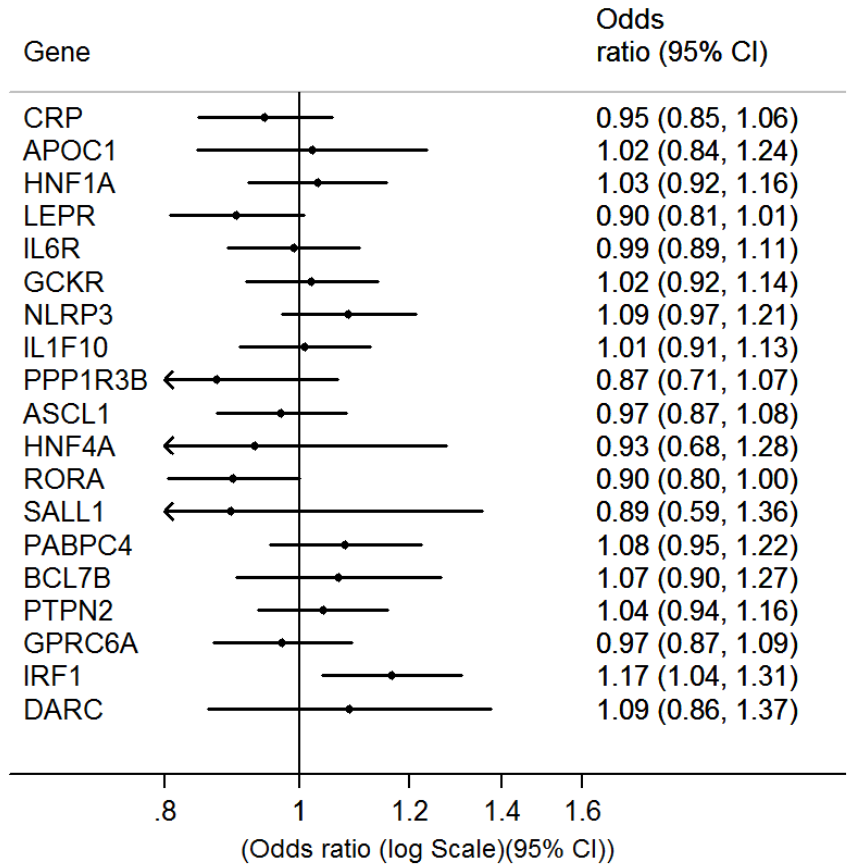

**Appendix Figure 2.** Associations between known CRP SNPs and periodontitis (proportion of sites with PD  $\geq 4$ mm) in the Study of Health in Pomerania (SHIP)

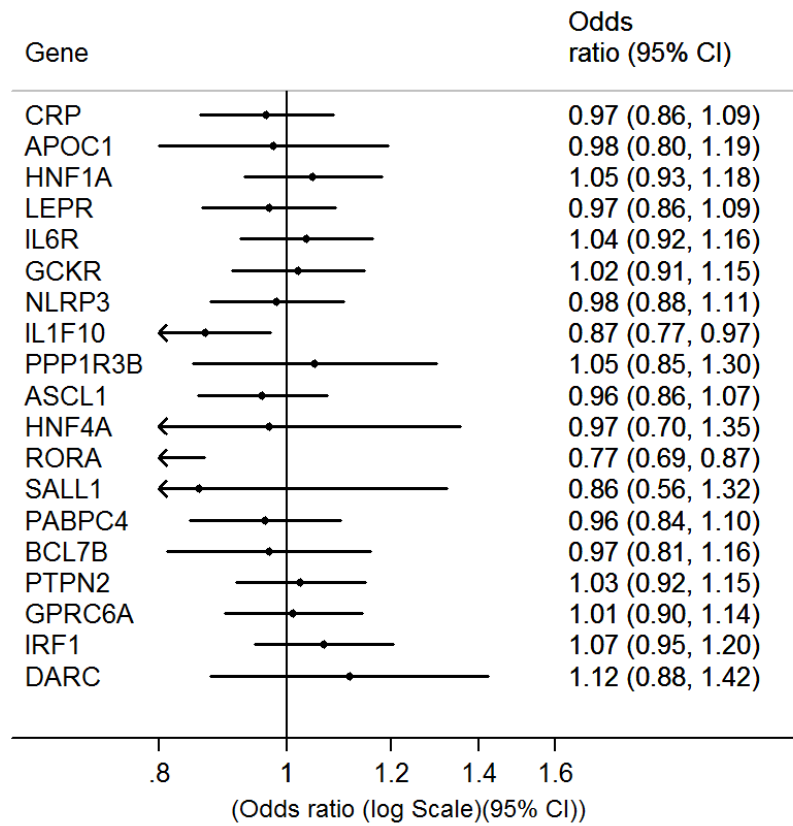

**Appendix Figure 3.** Associations between known CRP SNPs and periodontitis (proportion of sites with CAL  $\geq$ 3mm) in the Study of Health in Pomerania (SHIP)

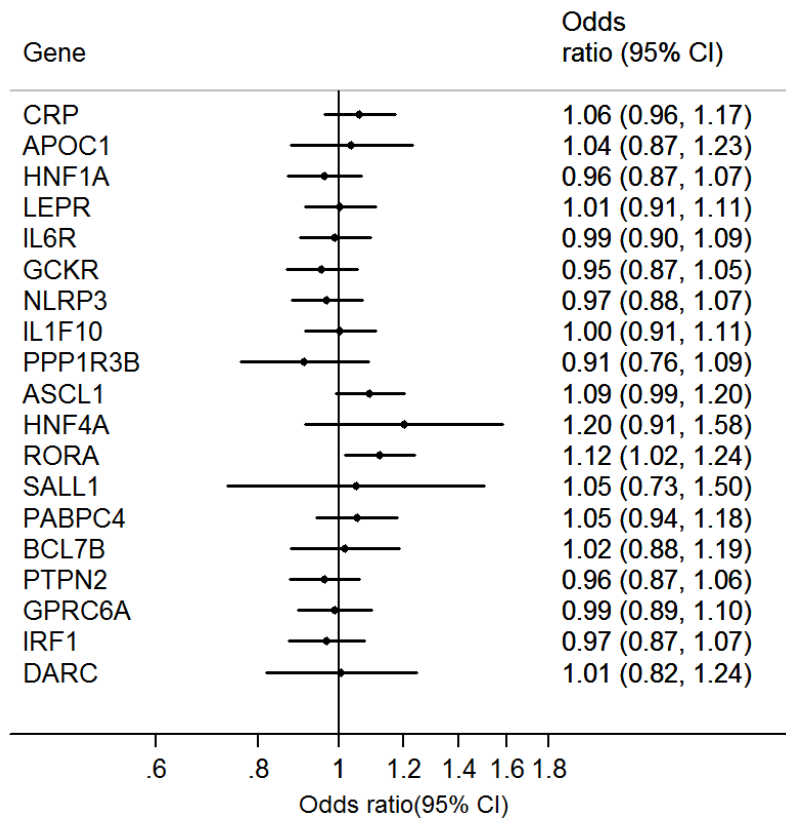

**Appendix Figure 4.** Associations between known CRP SNPs and periodontitis (CDC-AAP moderate/severe) in the Study of Health in Pomerania (SHIP)

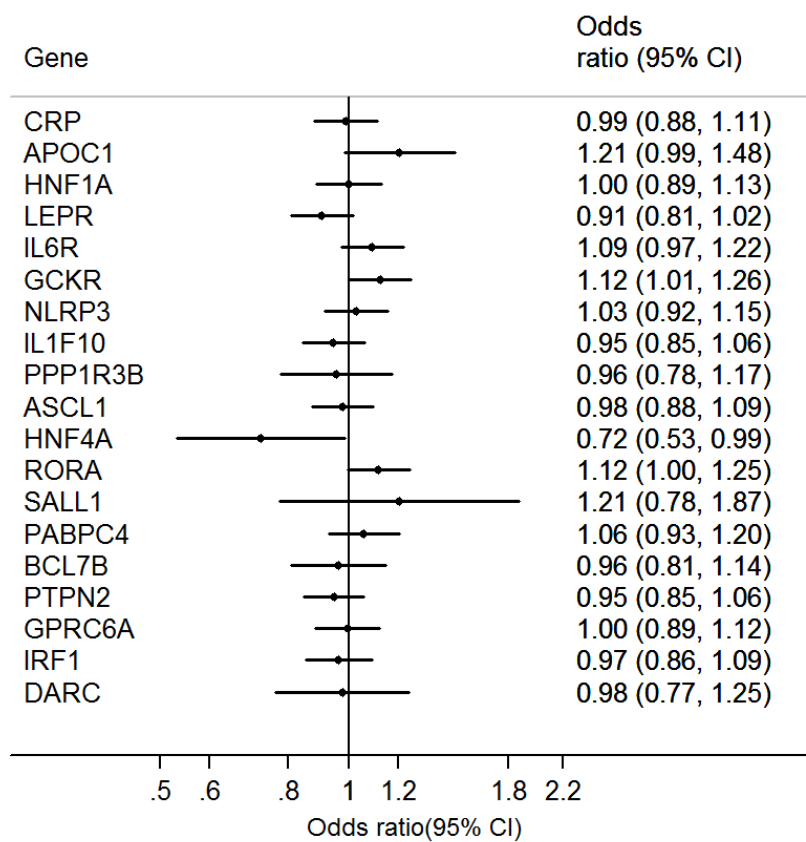

**Appendix Figure 5.** Associations between known CRP SNPs and Non-alcoholic Fatty Liver Disease (NAFLD) in the Study of Health in Pomerania (SHIP)

**Appendix Table 2.** Stratified analysis for the association between the proportion of periodontal sites with CAL  $\geq 3$ mm (0%, <30%,  $\geq 30\%$ ) and non-alcoholic fatty liver disease according to categories of the weighted genetic CRP score and serum CRP levels, in the Study of Health in Pomerania, 1997-2001

|                                                           | NAFLD |           | Prevalence Odds Ratio (95% CI) |                   |
|-----------------------------------------------------------|-------|-----------|--------------------------------|-------------------|
|                                                           | Cases | Non-cases | Crude                          | Adjusted*         |
| <b>wGS<sub>CRP</sub> <math>\leq 1.98</math> (N=1,222)</b> |       |           |                                |                   |
| No site (0%)                                              | 9     | 112       | Ref.                           | Ref.              |
| Moderate (<30%)                                           | 52    | 297       | 2.18 (1.04, 4.57)              | 1.34 (0.62, 2.93) |
| Extensive ( $\geq 30\%$ )                                 | 251   | 501       | 6.24 (3.11, 12.5)              | 1.44 (0.65, 3.19) |
| <b>wGS<sub>CRP</sub> &gt;1.98 (N=1,259)</b>               |       |           |                                |                   |
| No site (0%)                                              | 5     | 92        | Ref.                           | Ref.              |
| Moderate (<30%)                                           | 77    | 316       | 4.48 (1.76, 11.4)              | 2.99 (1.13, 7.86) |
| Extensive ( $\geq 30\%$ )                                 | 260   | 509       | 9.40 (3.77, 23.4)              | 2.85 (1.06, 7.64) |
| <b>Serum CRP &lt;1mg/L (N=972)</b>                        |       |           |                                |                   |
| No site (0%)                                              | 3     | 103       | Ref.                           | Ref.              |
| Moderate (<30%)                                           | 35    | 308       | 3.90 (1.18, 12.9)              | 2.43 (0.71, 8.31) |
| Extensive ( $\geq 30\%$ )                                 | 126   | 397       | 10.9 (3.40, 34.9)              | 2.58 (0.73, 9.10) |
| <b>Serum CRP 1-3mg/L (N=887)</b>                          |       |           |                                |                   |
| No site (0%)                                              | 7     | 66        | Ref.                           | Ref.              |
| Moderate (<30%)                                           | 55    | 202       | 2.57 (1.12, 5.91)              | 1.67 (0.67, 4.13) |
| Extensive ( $\geq 30\%$ )                                 | 195   | 362       | 5.08 (2.29, 11.3)              | 1.39 (0.55, 3.52) |
| <b>Serum CRP &gt;3mg/L (N=622)</b>                        |       |           |                                |                   |
| No site (0%)                                              | 4     | 35        | Ref.                           | Ref.              |
| Moderate (<30%)                                           | 39    | 103       | 3.31 (1.11, 9.94)              | 2.02 (0.64, 6.34) |
| Extensive ( $\geq 30\%$ )                                 | 190   | 251       | 6.62 (2.31, 18.9)              | 2.22 (0.70, 7.03) |

\*Adjusted for age, gender, waist circumference, smoking, physical activity, alcohol consumption and diabetes

CAL-clinical attachment level

CRP-C-reactive protein

wGS<sub>CRP</sub>- weighted genetic score for CRP

\*\*Interaction p-value for the genetic CRP score=0.3

\*\*\*Interaction p-value for serum CRP levels=0.2

**Appendix Table 3.** Stratified analysis investigating the relationship between periodontitis (CDC-AAP) and non-alcoholic fatty liver disease according to categories of the weighted genetic CRP score and serum CRP levels, in the Study of Health in Pomerania, 1997-2001

|                                             | NAFLD |           | Prevalence Odds Ratio (95% CI) |                   |
|---------------------------------------------|-------|-----------|--------------------------------|-------------------|
|                                             | Cases | Non-cases | Crude                          | Adjusted*         |
| <b>wGS<sub>CRP</sub> ≤1.98 (N=1,220)</b>    |       |           |                                |                   |
| None/mild                                   | 91    | 463       | Ref.                           | Ref.              |
| Moderate/Severe                             | 221   | 445       | 2.53 (1.92, 3.33)              | 1.26 (0.90, 1.76) |
| <b>wGS<sub>CRP</sub> &gt;1.98 (N=1,259)</b> |       |           |                                |                   |
| None/mild                                   | 112   | 467       | Ref.                           | Ref.              |
| Moderate/ Severe                            | 230   | 450       | 2.13 (1.64, 2.77)              | 1.09 (0.80, 1.50) |
| <b>Serum CRP &lt;1mg/L (N=971)</b>          |       |           |                                |                   |
| None/mild                                   | 49    | 462       | Ref.                           | Ref.              |
| Moderate/ Severe                            | 115   | 345       | 3.14 (2.19, 4.52)              | 1.43 (0.93, 2.19) |
| <b>Serum CRP 1-3mg/L (N=887)</b>            |       |           |                                |                   |
| None/mild                                   | 82    | 305       | Ref.                           | Ref.              |
| Moderate/ Severe                            | 175   | 325       | 2.00 (1.48, 2.72)              | 1.05 (0.72, 1.52) |
| <b>Serum CRP &gt;3mg/L (N=621)</b>          |       |           |                                |                   |
| None/mild                                   | 72    | 163       | Ref.                           | Ref.              |
| Moderate/severe                             | 161   | 225       | 1.62 (1.15, 2.28)              | 0.86 (0.56, 1.32) |

\*Adjusted for age, gender, waist circumference, smoking, physical activity, alcohol consumption and diabetes

CRP-C-reactive protein

wGS<sub>CRP</sub>- weighted genetic score for CRP

\*\*Interaction p-value for the genetic CRP score=0.8

\*\*\*Interaction p-value for serum CRP levels=0.014



**Appendix Table 4.** Distribution of baseline factors according to categories of serum CRP among participants of the Study of Health in Pomerania, 1997-2001

|                          | Low               | Intermediate      | High              |
|--------------------------|-------------------|-------------------|-------------------|
|                          | (CRP <1mg/L)      | (CRP 1-3mg/L)     | (CRP >3mg/L)      |
| CRP, mg/l                | 0.53 (0.32, 0.75) | 1.84 (1.30, 2.54) | 5.83 (4.05, 8.67) |
| Age, yrs.                | 43.0 (31.0, 56.0) | 47.0 (35.0, 61.0) | 52.0 (37.0, 63.0) |
| Waist circumference (cm) | 82.8 (74.0, 92.5) | 89.2 (78.8, 99.1) | 94.9 (84.2, 103)  |
| Alcohol*                 | 4.65 (1.34, 7.71) | 4.18 (1.31, 6.86) | 3.35 (0.65, 5.33) |
| Abdominal obesity**      | 150 (15.5)        | 284 (32.1)        | 313 (50.5)        |
| Physical activity        | 485 (50.2)        | 366 (41.4)        | 248 (40.1)        |
| Men                      | 472 (48.6)        | 408 (46.0)        | 235 (37.8)        |
| Smoking                  |                   |                   |                   |
| Never                    | 385 (39.8)        | 332 (37.6)        | 249 (40.2)        |
| Former                   | 289 (29.9)        | 307 (34.7)        | 184 (29.7)        |
| Current                  | 293 (30.3)        | 245 (27.7)        | 186 (30.1)        |
| Diabetes mellitus        | 125 (12.9)        | 191 (21.5)        | 149 (24.0)        |

Data are presented as No. (%) or Median (lower quartile, upper quartile)

\*Number of standard drinks in the past 30 days

\*\*Gender-specific weight circumference defined as  $\geq 88$ cm for women and  $\geq 102$ cm for men (Grundy et al. 2005)

#### e-References Cited

- Dehghan A, Dupuis J, Barbalic M, Bis JC, Eiriksdottir G, Lu C, Pellikka N, Wallaschofski H, Kettunen J, Henneman P et al. 2011. Meta-analysis of genome-wide association studies in >80 000 subjects identifies multiple loci for c-reactive protein levels. *Circulation*. 123(7):731-738.
- Grundy SM, Cleeman JI, Daniels SR, Donato KA, Eckel RH, Franklin BA, Gordon DJ, Krauss RM, Savage PJ, Smith SC, Jr. et al. 2005. Diagnosis and management of the metabolic syndrome: An american heart association/national heart, lung, and blood institute scientific statement. *Circulation*. United States. p. 2735-2752.
- Naitza S, Porcu E, Steri M, Taub DD, Mulas A, Xiao X, Strait J, Dei M, Lai S, Busonero F et al. 2012. A genome-wide association scan on the levels of markers of inflammation in sardinians reveals associations that underpin its complex regulation. *Plos genet*. United States. p. e1002480.
